# Supplementary material
Source: ML conference proceedings conference paper supplement (https://proceedings.neurips.cc/paper_files/paper/2015/hash/d96409bf894217686ba124d7356686c9-Abstract.html)
Supplement: Supplementary file [file d96409bf894217686ba124d7356686c9-Supplemental.zip]

---

## Supplementary Document: Deeply Learning the Messages in Message Passing Inference

---

**Guosheng Lin, Chunhua Shen, Ian Reid, Anton van den Hengel**

The University of Adelaide, Australia; and Australian Centre for Robotic Vision  
E-mail: {guosheng.lin,chunhua.shen,ian.reid,anton.vandenhengel}@adelaide.edu.au

This document contains the following contents:

1. Figure 1 shows the illustration of Network  $C^{(1)}$  for generating multi-scale feature map.
2. Figure 2 shows the illustration of Network  $C^{(2)}$  for generating message vector.
3. Figure 3 shows the illustration of building pairwise connections.
4. Figure 4 shows the network layer configuration.
5. Figure 5 shows some prediction examples of our method for semantic segmentation.

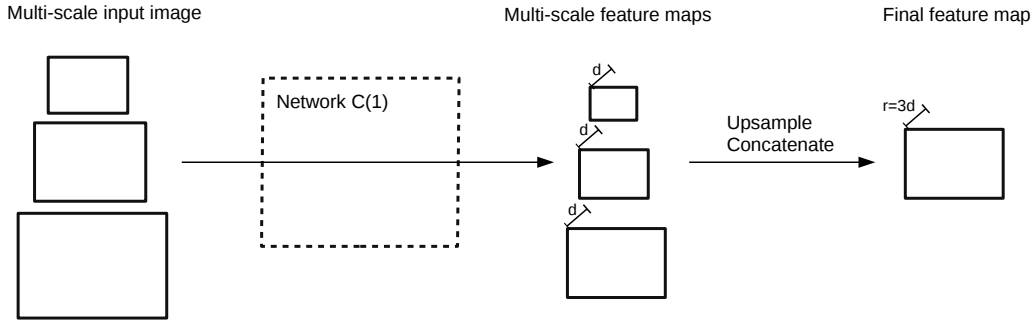

Figure 1: Illustration of Network  $C^{(1)}$  for generating multi-scale feature map.

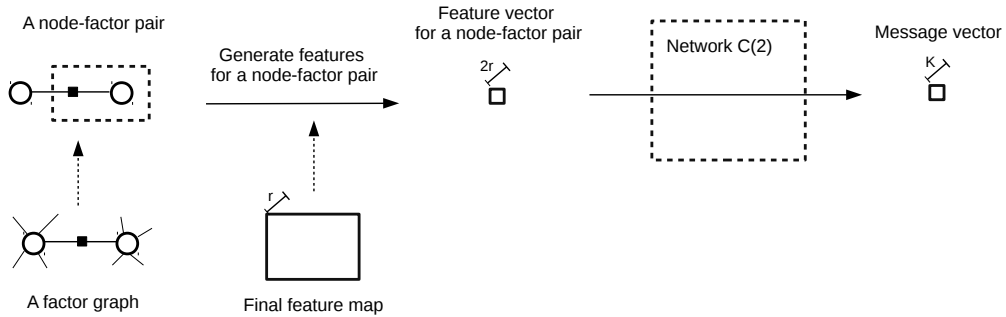

Figure 2: Illustration of Network  $C^{(2)}$  for generating message vector.

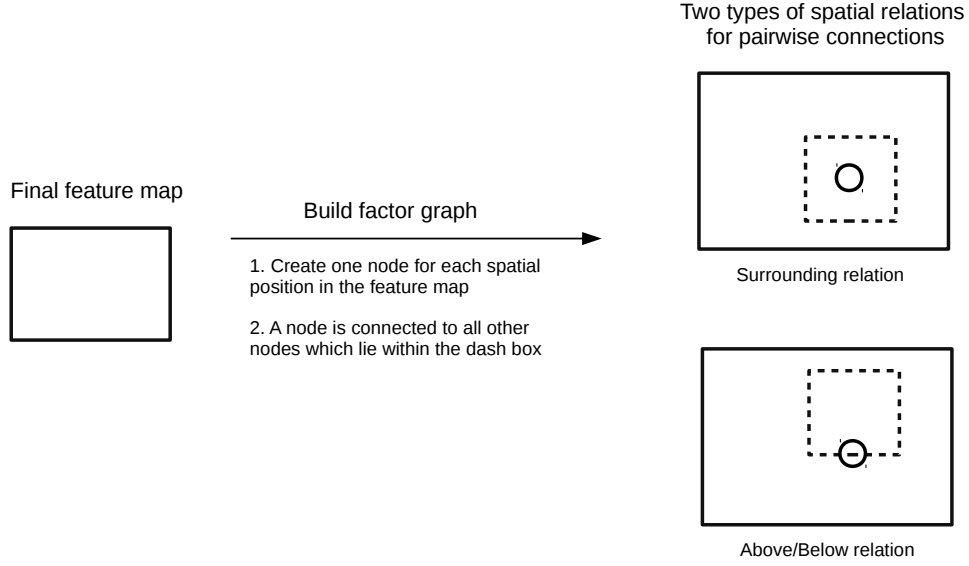

Figure 3: Illustration of building pairwise connections. We denote by  $a$  the length of the shortest edge of the feature map. The size of the range box (dash box in the figure) size is  $0.4a \times 0.4a$ . For the surrounding relation, the range box is centered on the node. For the above/below relation, the bottom edge of the range box is centered on the node.

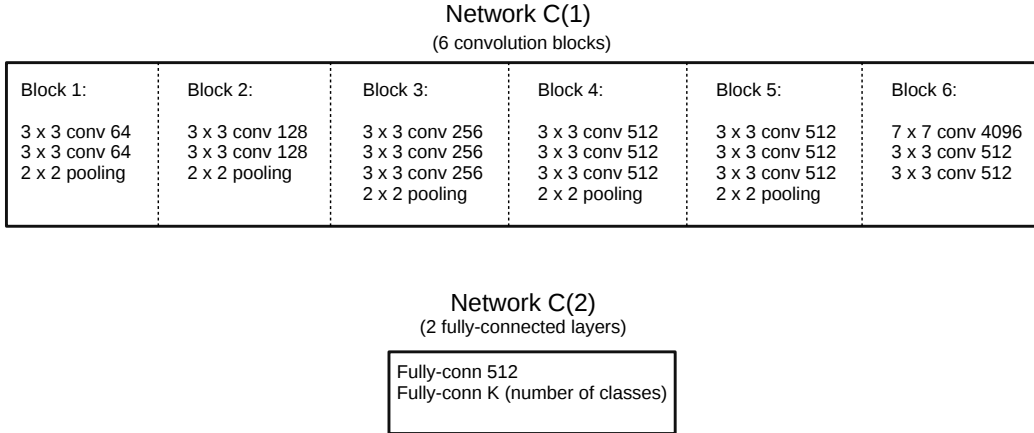

Figure 4: Network layer configuration. The top 5 convolution blocks share the same configuration as the convolution blocks in the VGG-16 network. The stride of the last max pooling layer is 1, and for other max pooling layers we use the same stride setting as that of the VGG-16 network.

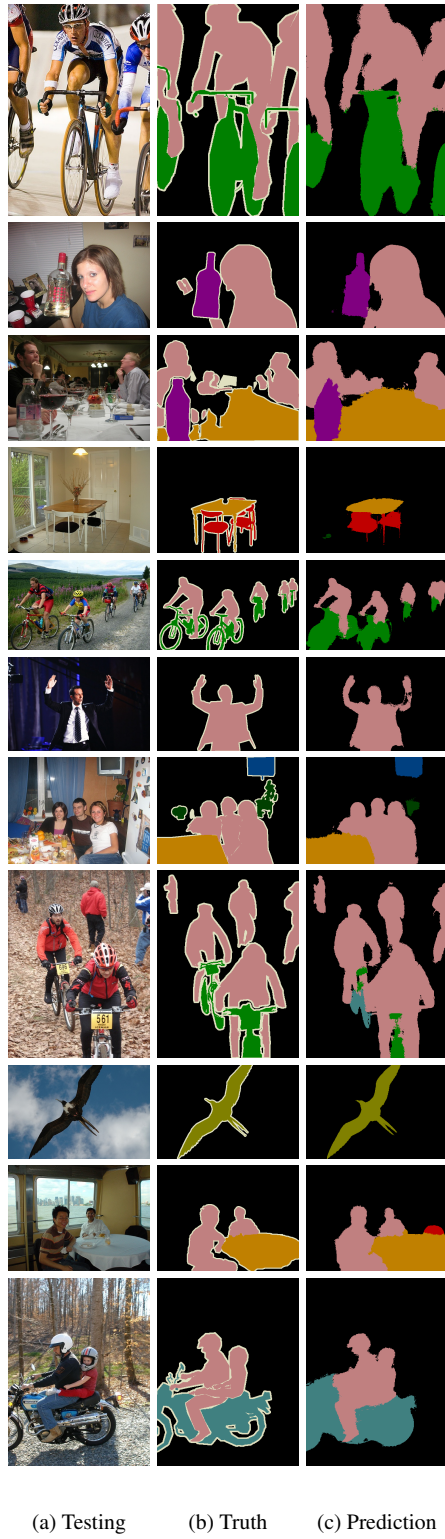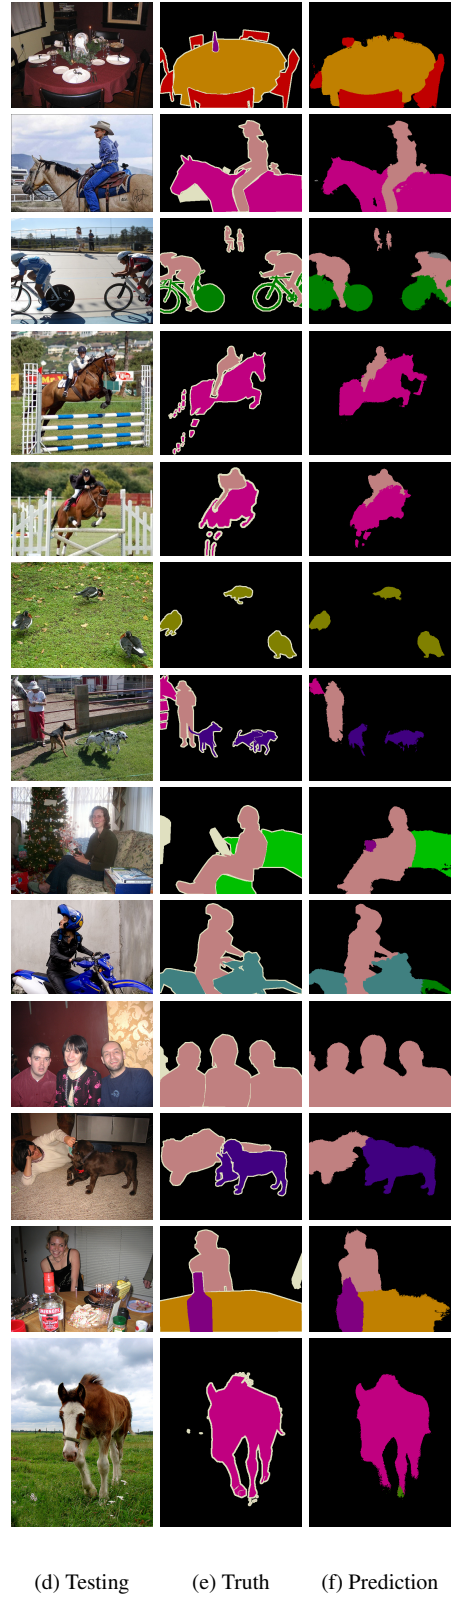

Figure 5: Some prediction examples of our method.
